# Supplementary material for: Thermolysis of fluorinated cycloalkylidene fulgides yields a new class of photochromic compoundsElectronic supplementary information (ESI) available: Synthetic procedures for 3–10. Optical and stability characterization methods. See http://www.rsc.org/suppdata/cc/b3/b300010a/
Source: Royal Society of Chemistry journal article supplement (doi:10.1039/b300010a), 2003-03-27
Supplement: b300010a.doc [file b300010a.doc]

**ELECTRONIC SUPPLEMENTARY INFORMATION**

New photochromic compounds Derived from the Thermolysis of Fluorinated Cycloalkylidene Fulgides

Mason A. Wolak, Nathan B. Gillespie, Robert R. Birge, and Watson J. Lees*

# Department of Chemistry and W. M. Keck Center for Molecular Electronics, Syracuse University, Syracuse, NY 13244.

**Description of Synthetic Route**

The most general synthetic route to fluorinated indolylfulgides begins with successive Stobbe condensations.1 However, Stobbe condensation of diethyl succinate with cyclohexanone failed to produce the desired product, instead yielding the self-condensation product 2-cyclohexylidene cyclohexanone.2 Fortunately, Michael addition of nitro-substituted cycloalkanes to dimethyl maleate proved to be an efficient alternative (Scheme 1).3 Condensation of the resulting dimethyl cycloalkylidene succinates **11** or **12** with trifluoroacetyl-substituted indoles **13**1 or **14**4 proceeded smoothly via treatment with LDA in toluene.5 Ring opening and hydrolysis of indolelactones **15**-**18** was accomplished by deprotonation with NaH in DMF, followed by the addition of water. Cycloalkylidene fulgides **3**-**6** were obtained upon quantitative dehydration of the intermediate diacids with acetic anhydride. The indolylethenylanhydrides were prepared from the cylcoalkylidene fulgides as described in the body of the text.

**Scheme 1**

# **Experimental**

**General Procedures and Materials.** All commercially available materials were used without further purification. NMR spectra were recorded on a Brüker 300 MHz NMR spectrometer. 1H and 13C NMR samples were internally referenced to TMS (0.00 ppm). UV-vis spectra were recorded with a Cary 1 or a Cary 50Bio Spectrophotometer. HPLC analysis was performed using a Waters 600 system with a Waters 2487 dual wavelength detector. Flash chromatography was performed with 230-400 mesh silica gel. E&R Microanalytical Laboratory Inc. performed all elemental analyses.

**General Preparation of Cycloalkylidene Succinates.**3A solution of dimethyl maleate (78 mmol, 1.12 g, 1 eq) and the corresponding nitrocycloalkane (78 mmol, 1 eq) was prepared in acetonitrile (200 mL). DBU (1,8-diazobicyclo[5.4.0]undec-7-ene, 80.3 mmol, 1.22 g, 1.03 eq) in acetonitrile (50 mL) was then added dropwise over the course of 25 minutes. The reaction was allowed to stir for 6 h and was then quenched with a mixture of H2O and diethyl ether. The aqueous layer was extracted with diethyl ether (150 mL) and the combined organics were dried with MgSO4 and filtered. The solvent was removed in vacuo and the resulting reddish oil was purified via flash chromatography (4:1 hexane/ethyl acetate), yielding a colorless oil.

**Dimethyl cyclopentylidene succinate (11):**394% yield: 1H NMR (CDCl3)  3.72 (s, 3H), 3.68 (s, 3H), 3.35 (s, 2H), 2.82 (t, *J* = 6.6 Hz, 2H), 2.40 (t, *J* = 6.6 Hz, 2H), 1.72 (m, 4H); 13C NMR (CDCl3)  171.8, 167.4, 165.1, 116.5, 51.7, 51.2, 35.7, 34.4, 34.0, 26.8, 25.4. Anal. Calcd for C11H16O4: C, 62.25; H, 7.60. Found: C, 61.98; H, 7.33.

**Dimethyl cyclohexylidene succinate (12):**3 91% yield: 1H NMR (CDCl­3)  3.69 (s, 3H), 3.64 (s, 3H), 3.36 (s, 2H), 2.61 (t, *J* = 5.6 Hz, 2H), 2.21 (t, *J* = 5.6 Hz, 2H), 1.64-1.52 (m, 6H); 13C NMR (CDCl3)  171.8, 168.9, 155.3, 117.3, 51.9, 51.5, 34.7, 32.5, 32.4, 28.2, 27.9, 26.3. Anal. Calcd for C12H18O4: C, 63.70; H, 8.02. Found: C, 63.55; H, 8.06.

**General Preparation of Indole Lactones (18 given as a representative).** To a stirred solution of cyclohexylidene dimethyl succinate (2.5 g, 11.1 mmol) and 3-trifluoroacetyl-5-methoxy-1,2-dimethylindole (1.5 g, 5.5 mmol) at room temperature was added 5.55 mL of a 2M solution of lithium diisopropylamide in toluene. The solution was allowed to stir overnight and was then acidified to neutrality with a 5% H­2SO4 solution. The aqueous layer was extracted with diethyl ether (3 x 100 mL). The combined organic layers were dried (MgSO4) and filtered, and the solvent was removed in vacuo. The resulting orange residue was purified via flash chromatography (4:1 hexane/ethyl acetate) and crystallized from ethanol, yielding 1.61 g (62.5% yield) of white needle-like crystals. As previously reported, the product was isolated as a mixture of atropisomers as discerned by 1H and 13C NMR.1,5

**Trifluoromethyl cyclopentylidene indolelactone (15):** 33% yield: 1H NMR (CDCl3)  8.25 (d, *J* = 7.8 Hz, 0.3H), 7.53 (d, *J* = 7.8 Hz, 0.7H), 7.25-7.03 (m, 3H), 4.67 (s, 0.7H), 4.49 (s, 0.3H), 3.66 (s, 2.1H), 3.63 (s, 0.9H), 3.15 (s, 0.9H), 3.12 (s, 2.1H), 2.99-2.90 (m, 2H), 2.67 (s, 2.1H), 2.61-2.45 (m, 2H), 2.41 (s, 0.9H), 1.89-1.73 (m, 4H); 13C NMR (CDCl3)  168.6, 168.3, 166.9, 166.7, 166.3, 165.4, 137.7, 136.7, 136.5, 133.5, 125.0 (q, *J* = 288 Hz), 124.9 (q, *J* = 288 Hz), 124.1, 122.1, 121.5, 121.0, 120.3, 119.91, 119.88, 119.1, 114.9, 114.8, 108.9, 108.4, 103.2, 101.9, 84.0 (q, *J* = 30 Hz), 83.5 (q, *J* = 30 Hz), 53.1, 52.1, 51.9, 51.8, 34.3, 34.2, 32.9, 32.7, 29.5, 26.4, 26.3, 25.6, 25.5, 13.5 (q, *J* = 4 Hz), 12.1. Anal. Calcd for C22H22F3NO4: C, 62.70; H, 5.26; F, 13.52; N, 3.32. Found: C, 62.51; H, 5.10; F, 13.36; N, 3.23.

**Trifluoromethyl cyclopentylidene 5-methoxyindolelactone (16):** 21.5% yield: 1H NMR (CDCl3)  7.73 (d, *J* = 2.5 Hz, 0.3H), 7.12 (d, *J* = 8.9 Hz, 0.7H), 7.11 (d, *J* = 8.9 Hz, 0.3H), 6.98 (s, 0.7H), 6.84 (dd, *J* = 8.9, 2.5 Hz, 0.3H), 6.80 (dd, *J* = 8.9, 2.5 Hz, 0.7H), 4.63 (s, 0.7H), 4.46 (s, 0.3H), 3.89 (s, 0.9H), 3.86 (s, 2.1H), 3.64 (s, 2.1H), 3.60 (s, 0.9H), 3.17 (s, 3H), 2.93 (m, 2H), 2.64 (s, 2.1H), 2.61-2.43 (m, 2H), 2.37 (s, 0.9H), 1.86-1.73 (m, 4H); 13C NMR (CDCl3)  168.6, 168.3, 166.8, 166.7, 166.4, 165.4, 154.3, 153.5, 138.3, 133.8, 132.0, 131.8, 127.2, 125.0 (q, *J* = 288 Hz)124.9 (q, *J* = 288 Hz) 124.5, 114.84, 114.8, 111.7, 110.4, 109.5, 109.0, 103.8, 102.9 (q, *J* = 3 Hz), 102.8, 101.5, 84.1 (q, *J* = 31 Hz), 83.5 (q, *J* = 31 Hz), 56.0, 55.9, 53.1, 52.1, 51.9, 51.6, 34.3, 34.2, 32.9, 32.7, 29.6, 26.4, 26.3, 25.53, 25.49, 13.5 (q, *J* = 4 Hz), 12.3.Anal. Calcd for C23H24F3NO5: C, 61.19; H, 5.36; F, 12.63; N, 3.10. Found: C, 61.02; H, 5.41; F, 12.55; N, 2.95.

**Trifluoromethyl cyclopentylidene indolelactone (17):** 47% yield: 1H NMR (CDCl3)  8.25 (d, *J* = 7.8 Hz, 0.3H), 7.54 (d, *J* = 8.3 Hz, 0.7H), 7.25-7.02 (m, 3H), 4.83 (s, 0.7H), 4.64 (s, 0.3H), 3.67 (s, 2.1H), 3.64 (s, 0.9H), 3.14 (s, 0.9H), 3.12 (s, 2.1H), 3.02-2.96 (m, 2H), 2.67 (s, 2.1H), 2.62 (s, 0.9H), 2.52-2.32 (m, 2H), 1.78-1.56 (m, 6H); 13C NMR (CDCl3)  169.2, 168.9, 166.8, 166.6, 162.3, 161.6, 137.7, 136.7, 136.5, 133.7, 125.0 (q, *J* = 288 Hz) 124.9 (q, *J* = 288 Hz) 124.1, 122.1, 121.5, 121.0, 120.2, 120.0 (q, *J* = 10 Hz), 119.2, 119.1, 115.2, 115.1, 108.9, 108.4, 103.1, 101.9, 83.3 (q, *J* = 31 Hz), 82.7 (q, *J* = 31 Hz), 52.3, 52.1, 52.0, 51.0, 34.4, 29.7, 29.53, 29.47, 29.3, 28.3, 28.1, 25.9, 13.5 (q, *J* = 4 Hz), 12.1.Anal. Calcd for C23H24F3NO4: C, 63.44; H, 5.56; F, 13.09; N, 3.22. Found: C, 63.62; H, 5.48; F, 13.28; N, 3.14.

**Trifluoromethyl cyclohexylidene 5-methoxyindolelactone (18):** 62.5% yield: 1H NMR (CDCl3)  7.73 (d, *J* = 2.5 Hz, 0.3H), 7.12 (d, *J* = 8.9 Hz, 0.7H), 7.10 (d, *J* = 8.9 Hz, 0.3H), 7.00 (bs, 0.7H), 6.84 (dd, *J* = 8.9, 2.5 Hz, 0.3H), 6.80 (dd, *J* = 8.9, 2.5 Hz, 0.7H), 4.79 (s, 0.7H), 4.62 (s, 0.3H), 3.89 (s, 0.9H), 3.86 (s, 2.1H), 3.63 (s, 2.1H), 3.60 (s, 0.9H), 3.16 (s, 3H), 3.03-2.96 (m, 2H), 2.64 (s, 2.1H), 2.38 (s, 0.9H), 2.44-2.33 (m, 2H), 1.76-1.54 (m, 6H); 13C NMR (CDCl3)  169.1, 168.9, 166.7, 166.6, 162.3, 161.6, 154.3, 153.5, 138.3, 134.0, 132.0, 131.8, 127.2, 125.0 (q, *J* = 288 Hz) 124.9 (q, *J* = 288 Hz) 124.5, 115.2, 115.1, 111.7, 110.4, 109.4, 109.0, 103.8, 103.1 (q, *J* = 3 Hz), 102.7, 101.5, 83.2 (q, *J* = 31 Hz), 82.7 (q, *J* = 31 Hz), 56.1, 55.9, 52.3, 52.1, 52.0, 50.8, 34.3, 29.65, 29.62, 29.5, 29.3, 28.2, 28.1, 25.9, 13.6 (q, *J* = 4 Hz), 12.3.Anal. Calcd for C24H26F3NO5: C, 61.93; H, 5.63; F, 12.24; N, 3.01. Found: C, 61.79; H, 5.53; F, 12.35; N, 2.87.

**General Preparation of Cycloalkylidene Fulgides.** To a stirred solution of indolelactone (2.5 mmol, 1 eq) in *N*,*N*-dimethylformamide (125 mL) at 0 ˚C was added sodium hydride (6.3 mmol, 2.5 eq). The solution was allowed to warm to room temperature and was carefully monitored by TLC (2:1 ethyl acetate/hexane) until all starting material was consumed. In some instances, additional sodium hydride was added to ensure complete consumption. Upon elimination, 5-10 equivalents of water were added to affect hydrolysis and the reaction was allowed to stir overnight. Solvent was removed in vacuo and the light brown residue was dissolved in 350 mL of a 50:50 H2O:ethyl acetate mixture. The organic layer was discarded and the aqueous layer was then acidified with 5% H2SO4 and extracted with ethyl acetate (4 x 100 mL). The combined organics were dried with MgSO4, filtered, and concentrated in vacuo. The resulting tan solid was washed with CHCl3, yielding the diacid as an eggshell white powder. The diacid was then suspended in toluene (60 mL) and acetic anhydride was added (40 mL). Upon moderate heating (~35 ˚C), the clear solution immediately took on an orange tint. The mixture was stirred for 45 minutes at 35 ˚C then the solvent was removed in vacuo. The product was crystallized from isopropanol, yielding fine dark orange needles.

**Fulgide Isolation** Cyclopentylidene fulgides **3** and **4** crystallized in *Z*-form while cyclohexylidene fulgides **5** and **6** crystallized in *E*-form. The *Z*-forms of **5** and **6** were obtained in quantitative yield by irradiating *E*-form solutions with  = 532 nm light followed by bleaching with  > 630 nm light to remove residual *C*-form. The *C*-forms of compounds **3**-**6** were obtained by irradiating *Z*-form solutions with 436 nm light followed by purification via flash column chromatography (toluene).

**Trifluoromethyl cyclopentylidene indolylfulgide (3):** 74% yield: (*Z*-form) 1H NMR (CDCl3)  7.32-7.13 (m, 4H), 3.72 (s, 3H), 2.91-2.70 (m, 2H), 2.28 (s, 3H), 1.52-1.39 (m, 2H), 1.37-1.23 (m, 2H), 0.96-0.90 (m, 2H); 13C NMR (CDCl3)  173.2, 162.3, 160.0, 138.4, 136.6, 131.9 (q, *J* = 34 Hz), 127.6, 125.1, 122.5, 122.1 (q, *J* = 276 Hz), 121.3, 119.6, 117.1, 109.5, 107.1, 37.6, 35.7, 30.1, 25.9, 25.2, 12.3. Anal. Calcd for C21H18F3NO3: C, 64.78; H, 4.66; F, 14.64; N, 3.60. Found: C, 64.73; H, 4.81; F, 14.48; N, 3.40. (*E*-form: from E/Z mixture) 1H NMR (CDCl3)  7.44 (d, *J* = 8.1 Hz, 1H), 7.33-7.10 (m, 3H), 3.76 (s, 3H), 3.18-2.64 (m, 4H), 2.34 (s, 3H), 2.05-1.83 (m, 3H), 1.78-1.65 (m, 1H); (*C*-form) 1H NMR (CDCl3)  7.74 (d, *J* = 9.0 Hz, 1H), 7.40 (t, *J* = 9.0 Hz, 1H), 6.82 (t, *J* = 9.0 Hz, 1H), 6.68 (d, *J* = 9.0 Hz, 1H), 2.95 (s, 3H), 2.80-2.70 (m, 1H), 2.28-2.04 (m, 3H), 1.87-1.71 (m, 1H), 1.70-1.60 (m, 3H), 1.41 (s, 3H).

**Trifluoromethyl cyclopentylidene 5-methoxyindolylfulgide (4):** 68% yield: (*Z*-form) 1H NMR (CDCl3)  7.18 (d, *J* = 8.9 Hz, 1H), 6.87 (dd, *J* = 8.9, 2.4 Hz, 1H), 6.59 (d, *J* = 2.4 Hz, 1H), 3.80 (s, 3H), 3.69 (s, 3H), 2.92-2.72 (m, 2H), 2.26 (s, 3H), 1.55-1.40 (m, 2H), 1.38-1.24 (m, 2H), 0.93 (t, *J* = 6.9 Hz, 2H); 13C NMR (CDCl3)  172.8, 162.3, 160.1, 155.2, 138.7, 132.1, 131.6, 127.1, 125.6, 122.1 (q, *J* = 278 Hz), 117.2, 112.4, 110.3, 106.8, 101.6, 55.8, 37.6, 35.7, 30.3, 25.9, 25.2, 12.4. Anal. Calcd for C22H20F3NO4: C, 63.00; H, 4.81; F, 13.59; N, 3.34. Found: C, 62.90; H, 4.94; F, 13.50; N, 3.10. (*E*-form: from E/Z mixture) 1H NMR (CDCl3)  7.20 (d, *J* = 8.7 Hz, 1H), 6.89 (bs, 1H), 6.85 (m, 1H), 3.82 (s, 3H), 3.72 (s, 3H), 3.20-2.70 (m, 4H), 2.31 (s, 3H), 2.06-1.80 (m, 3H), 1.77-1.63 (m, 1H); (*C*-form) 1H NMR (CDCl3)  7.19 (m, 1H), 7.10 (dd, *J* = 9.0, 2.4 Hz, 1H), 6.66 (d, *J* = 9.0 Hz, 1H), 3.79 (s, 3H), 2.92 (s, 3H), 2.80-2.70 (m, 1H), 2.41-2.03 (m, 3H), 1.88-1.73 (m, 1H), 1.69-1.59 (m, 3H), 1.40 (s, 3H).

**Trifluoromethyl cyclohexylidene indolylfulgide (5):** 80% yield: (*Z*-form) 1H NMR (CDCl3)  7.31-7.13 (m, 4H), 3.71 (s, 3H), 2.91-2.82 (m, 1H), 2.67-2.58 (m, 1H), 2.29 (s, 3H), 1.50-1.34 (m, 4H), 1.29-1.18 (m, 2H), 0.62 (pent, *J* = 6.0 Hz, 2H); 13C NMR (CDCl3)  167.6, 161.7, 159.7, 137.2, 137.0, 132.5 (q, *J* = 35 Hz), 129.0, 124.7, 122.3, 121.9 (q, *J* = 278 Hz), 121.2, 119.4, 117.5, 109.4, 109.1, 34.7, 31.1, 30.0, 27.7, 26.4, 25.0, 12.2. Anal. Calcd for C22H20F3NO3: C, 65.50; H, 5.00; F, 14.13; N, 3.47. Found: C, 65.14; H, 5.21; F, 14.27; N, 3.35. (*E*-form) 1H NMR (CDCl3)  7.43 (d, *J* = 8.1 Hz, 1H), 7.32 (d, *J* = 8.1 Hz, 1H), 7.23 (td, *J* = 8.1, 1.2 Hz, 1H), 7.14 (td, *J* = 8.1, 1.2 Hz, 1H), 3.76 (s, 3H), 3.28 (m, 1H), 2.94 (m, 1H), 2.60 (m, 2H), 2.35 (s, 3H), 1.73-1.91 (m, 6H); (*C*-form) 1H NMR (CDCl3)  7.71 (d, *J* = 8.1 Hz, 1H), 7.40 (t, *J* = 8.1 Hz, 1H), 6.83 (t, *J* = 8.1 Hz, 1H), 6.68 (d, *J* = 8.1 Hz, 1H), 2.95 (s, 3H), 2.34-2.15 (m, 3H), 1.84-1.60 (m, 5H), 1.37 (s, 3H), 1.15-0.95 (m, 2H).

**Trifluoromethyl cyclohexylidene 5-methoxyindolylfulgide (6):** 77% yield:(*Z*-form) 1H NMR (CDCl3)  7.18 (d, *J* = 8.9 Hz, 1H), 6.86 (dd, *J* = 8.9, 2.4 Hz, 1H), 6.57 (d, *J* = 2.4 Hz, 1H), 3.79 (s, 3H), 3.67 (s, 3H), 2.90 (m, 1H), 2.60 (m, 1H), 2.28 (s, 3H), 1.58-1.23 (m, 6H), 0.68 (m, 2H); 13C NMR (CDCl3)  167.3, 163.4, 161.7, 155.2, 137.7, 132.6, 132.1, 127.8, 125.0, 121.9 (q, *J* = 278 Hz), 117.7, 112.4, 110.3, 109.6, 101.3, 55.8, 34.6, 31.0, 30.1, 27.7, 26.4, 25.0, 12.3. Anal. Calcd for C23H22F3NO4: C, 63.74; H, 5.12; F, 13.15; N, 3.23. Found: C, 63.69; H, 4.96; F, 13.09; N, 3.06. (*E*-form) 1H NMR (CDCl3)  7.20 (d, *J* = 9.0 Hz, 1H), 6.92 (bs, 1H), 6.87 (dd, *J* = 9.0, 2.4 Hz, 1H), 3.82 (s, 3H), 3.72 (s, 3H), 3.40-3.27 (m, 1H), 2.95-2.81 (m, 1H), 2.62-2.54 (m, 2H), 2.32 (s, 3H), 1.95-1.80 (m, 2H), 1.79-1.66 (m, 4H); (*C*-form) 1H NMR (CDCl3)  7.16 (bs, 1H), 7.10 (dd, *J* = 9.0, 2.4 Hz, 1H), 6.66 (d, *J* = 9.0 Hz, 1H), 3.79 (s, 3H), 2.91 (s, 3H), 2.40-2.27 (m, 2H), 2.20-2.11 (m, 1H), 1.89-1.60 (m, 5H), 1.36 (s, 3H), 1.15-0.95 (m, 2H).

**General Preparation of Indolylethenylanhydrides.** A dilute solution (0.1 mM) of fulgide **3** or **4** in toluene or fulgide **5** or **6** in *o*-xylene was stirred at reflux for 3 d or 5 d respectively. The product was concentrated in vacuo and purified via flash chromatography (4:1 hexane/ethyl acetate), yielding a brick red amorphous solid.

**Indolylethenylanhydride Isolation** Compounds **7**-**10** were initially isolated in the *Z*-form. Generation of the *C*-form of **8** was accomplished via irradiation of a *Z*-form solution with 488 nm light supplied by an SpectraPhysics Ar:ion laser. *C*-forms of **9** and **10** were obtained by irradiation of *Z*-form solutions with 436 nm light from a 200 W Oriel Hg(Xe) lamp. The *C*-forms were purified via flash chromatography (4:1 hexane/ethyl acetate) and used directly for spectra determination.

**Indolylcyclopentenylanhydride (7):** 78% yield: (Z-form) 1H NMR (CDCl3)  7.30-7.06 (m, 4H), 3.68 (s, 3H), 3.04-2.92 (m, 4H), 2.52 (q, *J* = 10.3 Hz, 2H), 2.25 (s, 3H), 2.19 (pent, *J* = 7.5 Hz, 2H); 13C NMR (CDCl3)  165.1, 163.9, 147.7, 146.3, 137.0, 133.9, 128.3, 126.6, 124.7, 124.3 (q, *J* = 278 Hz), 121.9, 120.5, 118.9, 109.7, 109.3, 39.2, 35.8, 29.8, 28.8 (q, *J* = 33 Hz), 24.0, 11.4. Anal. Calcd for C21H18F3NO3: C, 64.78; H, 4.66; F, 14.64; N, 3.60. Found: C, 64.87; H, 4.95; F, 14.33; N, 3.68.

**5-Methoxyindolylcyclopentenylanhydride (8):** 72% yield: 1H NMR (CDCl3)  7.16 (d, *J* = 8.9 Hz, 1 H), 6.83 (dd, *J* = 8.9, 2.4 Hz, 1H), 6.58 (d, *J* = 2.4 Hz, 1H), 3.79 (s, 3H), 3.65 (s, 3H), 3.04-2.91 (m, 4H), 2.53 (q, *J* = 10.2 Hz, 2H), 2.24 (s, 3H), 2.19 (pent, *J* = 7.5 Hz, 2H); 13C NMR (CDCl3)  165.0, 164.1, 154.8, 147.6, 146.3, 134.4, 132.1, 128.3 (q, *J* = 3 Hz), 126.4, 125.0, 124.4 (q, *J* = 279 Hz), 111.9, 110.1, 109.4, 100.7, 55.7, 39.1, 35.8, 29.9, 28.8 (q, *J* = 33 Hz), 24.0, 11.5. Anal. Calcd for C22H20F3NO4: C, 63.00; H, 4.81; F, 13.59; N, 3.34. Found: C, 62.82; H, 4.69; F, 13.45; N, 3.18. (C-form) 1H NMR (CDCl3)  6.93-6.87 (m, 2H), 6.59 (d, *J* = 8.7 Hz, 1H), 3.79 (s, 3H), 2.98 (s, 3H), 2.96-2.72 (m, 6H), 2.14-2.09 (m, 2H), 1.33 (s, 3H).

**Indolylcyclohexenylanhydride (9):** 31% yield: (Z-form) 1H NMR (CDCl3)  7.48-7.37 (m, 1H), 7.24-7.03 (m, 3H), 3.62 (s, 3H), 2.94-2.45 (m, 4H), 2.37-2.05 (m, 5H), 1.95-1.81 (m, 4H); 13C NMR (CDCl3)  164.7, 163.9, 150.6, 138.3, 136.7, 132.8, 131.2, 125.3, 125.2, 124.2 (q, *J* = 278 Hz), 121.5, 120.1, 119.1, 118.0, 109.3, 31.8, 29.8, 28.4 (q, *J* = 32 Hz), 28.3, 22.4, 22.2, 10.7. Anal. Calcd for C22H20F3NO3: C, 65.50; H, 5.00; F, 14.13; N, 3.47. Found: C, 65.32; H, 4.74; F, 13.97; N, 3.65. (C-form) 1H NMR (CDCl3)  7.47 (d, *J* = 7.6 Hz, 1H), 7.31-7.23 (m, 1H), 6.79 (t, *J* = 7.6 Hz, 1H), 6.62 (d, *J* = 8.2 Hz, 1H), 3.07-2.75 (m, 4H), 3.00 (s, 3H), 2.70 (q, *J* = 5.6 Hz, 2H), 1.92-1.79 (m, 2H), 1.62-1.53 (m, 2H), 1.37 (s, 3H).

**5-Methoxyindolylcyclohexenylanhydride (10):** 27% yield: (Z-form) 1H NMR (CDCl3)  7.15-7.08 (m, 1H), 6.88-6.74 (m, 2H), 3.82 (bs, 3H), 3.60 (s, 3H), 2.90-2.55 (m, 4H), 2.40-2.03 (m, 5H), 1.97-1.82 (m, 4H); 13C NMR (CDCl3)  164.7, 164.0, 154.6, 150.6, 138.1, 130.2, 128.5, 127.7, 126.0, 125.5, 125.2, 124.2 (q, *J* = 278 Hz), 111.1, 110.1, 100.3, 55.8, 31.6, 29.8, 28.4 (q, *J* = 32 Hz), 28.3, 22.4, 22.1, 10.7. Anal. Calcd for C23H22F3NO4: C, 63.74; H, 5.12; F, 13.15; N, 3.23. Found: C, 63.74; H, 5.28; F, 13.09; N, 3.25. (C-form) 1H NMR (CDCl3)  7.04 (d, *J* = 2.6 Hz, 1H), 6.92 (dd, *J* = 9.0, 2.6 Hz, 1H), 6.57 (d, *J* = 9.0 Hz, 1H), 3.79 (s, 3H), 3.10-2.75 (m, 4H), 2.94 (s, 3H), 2.70 (q, *J* = 5.5 Hz, 2H), 1.95-1.79 (m, 2H), 1.62-1.55 (m, 2H), 1.35 (s, 3H).

**Spectra Determination** Concentrated, air-saturated stock solutions of the *Z-*form of fulgides **3**-**6** and indolylethenylanhydrides **7**-**10** in toluene were prepared in duplicate or triplicate. From each stock solution, 5 samples ranging in concentration from 0.20 to 0.05 mM were prepared by dilution with toluene. Absorption coefficients and max were determined. *E*-form spectra for fulgides **5** and **6** were obtained in a similar manner.

*E*-form spectra for fulgides **3** and **4** were obtained via spectral subtraction of an *E*/*Z* mixture in toluene-*d*8 generated by irradiation with 350 nm light. The solution was bleached with > 630 nm light to eliminate *C*-form fulgide and the relative concentration of *E*- and *Z*-form was determined via 1H NMR.

Stock solutions containing freshly purified *C-*forms of **3**-**6** and **8**-**10** were diluted to 4 or 5 different concentrations and their UV-vis spectra obtained. Each *C-*form solution was then quantitatively converted to *Z-*form with > 630 nm light and the concentration of fulgide or indolylethenylanhydride present was ascertained using the predetermined *Z-*form extinction coefficients. Absorption coefficients and max for the *C-*forms were then determined from the initial spectra.

**Quantum Yields.** Quantum yields for ring closing (ZC) of fulgides **3**-**6** were determined with monochromatic light of wavelength 427 nm. Quantum yields for ring closing (ZC) of indolylethenylanhydrides **8**-**10** were determined with monochromatic light of wavelength 488 nm. Quantum yields for ring-opening reactions (CZ) were determined with monochromatic light of wavelength 559 nm for the fulgides and 605 nm for the indolylethenylanhydrides. A Coherent Infinity XPO laser served as the irradiation source for all quantum yield experiments. Air-saturated solutions of the *Z*- or *C*-forms of compounds **3**-**6** and **8**-**10** were prepared in toluene with an approximate concentration of 0.1 mM. Samples were irradiated to between 5 and 10% conversion as determined by HPLC and UV-vis. Molectron J-25 energy detectors measured the amount of light absorbed by the sample solution in comparison to a toluene blank. Separation of fulgide isomers for the coloration and bleaching reactions was achieved using a Waters Spherisorb S5 W column with 24:1 toluene/ethyl acetate as the eluent at a flow rate of 1.4 mL/min. Separation of the indolylethenylanhydride isomers was achieved using the same column with 8:1 hexane/dioxane as the eluent at a flow rate of 1.1 mL/min. The apparatus was calibrated with fluorinated indolylfulgide **1**.

**Photostationary State Measurements** Fulgides **3**-**6** were irradiated with 427 nm light supplied by a Coherent Infinity XPO laser and their isomeric ratios monitored via UV-vis until a photostationary state (PSS427nm) was attained. Indolylethenylanhydrides **8**-**10** were irradiated with 488 nm light. The isomers were separated using a Waters Spherisorb S5 W column with 8:1 hexane/dioxane as the eluent at a flow rate of 1.1 mL/min. A 1:1:1 mixture of the three fulgide isomers and a 1:1 mixture of the indolylethenylanhydride isomers in toluene was analyzed via HPLC to ascertain their relative extinction coefficients in the HPLC solvent.

**Photochemical Stability** Air-saturated solutions of the *Z-*form of compounds **3**-**6** and **8**-**10** were prepared in toluene with an initial absorbance of approximately 0.6 at the wavelength absorption maxima. Samples were irradiated to photostationary state with light supplied from an Oriel 200 W Hg(Xe) lamp utilizing a 436 nm narrow bandpass filter. After measuring the UV-Vis spectra of the PSS436nm mixture, a pure *Z*-form solution was irradiated to 90% of the PSS and the reaction was timed. The 90% PSS mixture was then bleached with > 630 nm light using a separate filter and again timed. For fulgides **3**-**6**, the absorbance at the *C-*form max was < 0.01 upon bleaching. For indolylethenylanhydrides **8**-**10**, quantitative bleaching was established with return to the initial *Z*-form absorbance at max.

Once the duration of irradiation was established for both the 90% PSS coloration and < 1% *C-*form bleaching reactions, the system was automated through use of a filter switch. All solutions were capped and stirred. Control experiments were performed to correct for evaporation. After a designated number of irradiation cycles, the fulgide samples were fully converted to PSS436nm and their UV-Vis spectra scanned. The photochemical fatigue was then determined by comparison with the initial PSS436nm absorption spectra. Indolylethenylanhydride solutions were quantitatively converted to the *Z*-form and the resulting spectra were compared to the original spectra.

**Thermal Stability** Fulgide or indolylethenylanhydride-dopedPMMA thin films were prepared and their thermal stability was measured as previously reported.6

### References

(1) Thomas, C. J.; Wolak, M. A.; Birge, R. R.; Lees, W. J. *J. Org. Chem.* **2001**, *66*, 1914-8.

(2) Alvarez-Ibarra, C.; Lopez-Ranz, M. M.; Lopez-Sanchez, M. I.; Orellana, G.; Ortiz, P.; Quiroga, M. L. *J. Chem. Soc. Perkin Trans. 1* **1989**, 1577-84.

(3) Ballani, R.; Bosica, G.; Damiani, M.; Righi, P. *Tetrahedron* **1999**, *55*, 13451-6.

(4) Wolak, M. A.; Gillespie, N. B.; Thomas, C. J.; Birge, R. R.; Lees, W. J. *J. Photochem. Photobiol. A: Chem.* **2001**, *147*, 39-44.

(5) Janicki, S. Z.; Schuster, G. B. *J. Am. Chem. Soc.* **1995**, *117*, 8524-7.

(6) Wolak, M. A.; Gillespie, N. B.; Thomas, C. J.; Birge, R. R.; Lees, W. J. *J. Photochem. Photobiol., A* **2001**, *144*, 83-91.
